# Supplementary material for: Controllable incorporation of 1,2,4-triazolate into cluster-based metal-chalcogenide frameworks
Source: Royal Society of Chemistry journal article supplement (doi:10.1039/d0dt02492a), 2020-01-01
Supplement: d0dt02492a1.pdf [file d0dt02492a1.pdf]

*Supporting Information for*

**Controllable incorporation of 1,2,4-triazolate into  
cluster-based metal-chalcogenide frameworks**

Xiaoshuang Liu, Chaozhuang Xue, Xiang Wang, Jiaxu Zhang\* and Tao Wu

College of Chemistry, Chemical Engineering and Materials Science, Soochow University, Suzhou,  
Jiangsu 215123, China

E-mail: [jxzhang@suda.edu.cn](mailto:jxzhang@suda.edu.cn)

## Experimental Section:

**Chemicals and Materials.** Indium nitrate hydrate ( $\text{In}(\text{NO}_3)_3 \cdot 4.5\text{H}_2\text{O}$ ,  $\geq 99.5\%$ ), thiourea ( $\text{CH}_4\text{N}_2\text{S}$ , 99%), sulfide powder ( $\text{S}$ ,  $\geq 99.5\%$ ), acetonitrile ( $\text{C}_2\text{H}_3\text{N}$ ,  $\geq 98\%$ ), 1,2,4-triazole ( $\text{C}_2\text{H}_3\text{N}_3$ , 98%), 1,5-diazabicyclo[4.3.0]non-5-ene (DBN, 98%), 1,8-diazabicyclo [5.4.0]undec-7-ene (DBU), 1-(2-aminoethyl)piperazine (AEP,  $>99.0\%$ ), 2-amino-1-butanol (AB, 98%), N,N-dimethylformamide (DMF,  $\geq 98\%$ ) were all used without any further purification.

**Synthesis of SCTF-1.** A mixture of  $\text{In}(\text{NO}_3)_3 \cdot 4.5\text{H}_2\text{O}$  (124 mg, 1 mmol), sulfide powder (96 mg, 3 mmol), 1,2,4-triazole (105 mg, 1.5 mmol), DMF (2 mL), AB (2 mL), DBN (2 mL) were stirred in a 23-mL Teflon-lined stainless steel autoclave for half an hour. The vessel was sealed and heated at 180 °C for 7 days, then the autoclave was cooled to room temperature. After the raw products were washed by absolute ethyl alcohol several times, a large number of colorless crystals were obtained. The phase purity was identified by powder X-ray diffraction measurements.

**Synthesis of SCTF-2.** A mixture of  $\text{In}(\text{NO}_3)_3 \cdot 4.5\text{H}_2\text{O}$  (124 mg, 1 mmol), thiourea (76 mg, 1 mmol), 1,2,4-triazole (75 mg, 1 mmol), acetonitrile (1 mL), AEP (1 mL), DBU (3 mL) were stirred in a 23-mL Teflon-lined stainless steel autoclave for half an hour. The vessel was sealed and heated at 150 °C for 7 days, then the autoclave was cooled to room temperature. After the raw products were washed by absolute ethyl alcohol several times, a large number of yellowish crystals were obtained. The phase purity was identified by powder X-ray diffraction measurements.

**Single Crystal X-ray Diffraction (SCXRD).** Single-crystal X-ray diffraction measurements were performed on Photon II CPAD diffractometer controlled using graphite mono-chromated Mo-K $\alpha$  ( $\lambda = 0.71073 \text{ \AA}$ ) radiation at 120 K. The structure was solved by direct method using SHELXS-2014 and the refinements against all reflections of the compound were performed using SHELXL-2014.

**Powder X-ray Diffraction (PXRD).** PXRD data were collected on a desktop

diffractometer (D2 PHASER, Bruker, Germany) using Cu-K $\alpha$  ( $\lambda = 1.54184 \text{ \AA}$ ) radiation operated at 30 kV and 10 mA. The samples were ground into fine powders for several minutes before the test.

**Elemental Analysis.** Energy dispersive spectroscopy (EDS) analysis was performed on scanning electron microscope (SEM) equipped with energy dispersive spectroscopy (EDS) detector. An accelerating voltage of 25 kV and 40 s accumulation time were applied. Elemental analysis of C, H, and N was performed on VARIDEL III elemental analyzer. (**SCTF-1**, *Calcd.*: C, 19.66; N, 7.26; H, 2.55 wt%; *Found*: C, 19.27; N, 7.31; H, 3.42 wt%; and **SCTF-2** *Calcd.*: C, 18.76; N, 7.69; H, 2.41 wt%; *Found*: C, 22.10; N, 7.57; H, 3.78 wt%).

**Thermogravimetric (TG) Measurement.** A Shimadzu TGA-50 thermal analyzer was used to measure the TG curve by heating the sample from room temperature to 800 °C with heating rate of 10 °C /min under N<sub>2</sub> flow.

**Fourier-Transform Infrared Absorption.** Fourier transform-Infrared spectral analysis was performed on a Thermo Nicolet Avatar 6700 FT-IR spectrometer with cesium iodide optics allowing the instrument to observe from 600-4000 cm<sup>-1</sup>.

**UV-Vis Absorption.** Room-temperature solid-state UV-Vis diffusion reflectance spectra of **SCTF-1** and **SCTF-2** samples were measured on a SHIMADZU UV-3600 UV-Vis-NIR spectrophotometer coupled with an integrating sphere by using BaSO<sub>4</sub> powder as the reflectance reference. The absorption spectra were calculated from reflectance spectra by using the Kubelka-Munk function:  $F(R) = \alpha/S = (1-R)^2/2R$ , where  $R$ ,  $\alpha$ , and  $S$  are the reflection, the absorption and the scattering coefficient, respectively. In order to determine the band edge of the direct-gap semiconductor, the relation between the absorption coefficients ( $\alpha$ ) and the incident photon energy ( $h\nu$ ) is exhibited as  $\alpha h\nu = A(h\nu - E_g)^{1/2}$ , where  $A$  is a constant that relates to the effective masses associated with the valence and conduction bands, and  $E_g$  is the optical transition gap of the solid material. The band gap of the obtained samples can be

determined from the Tauc plot with  $[F(R) \cdot h\nu]^2$  vs.  $h\nu$  by extrapolating the linear region to the abscissa.

**Table S1.** Crystallographic data and structure refinement parameters for **SCTF-1** and **SCTF-2**.

| <b>Compound</b>                                                             | <b>SCTF-1</b>           | <b>SCTF-2</b>  |
|-----------------------------------------------------------------------------|-------------------------|----------------|
| Crystal system                                                              | monoclinic              | orthorhombic   |
| Space group                                                                 | <i>P2<sub>1</sub>/c</i> | <i>Pbca</i>    |
| <i>Z</i>                                                                    | 4                       | 8              |
| <i>a</i> (Å)                                                                | 32.120(4)               | 20.887(4)      |
| <i>b</i> (Å)                                                                | 20.820(2)               | 22.592(5)      |
| <i>c</i> (Å)                                                                | 22.273(2)               | 33.244(7)      |
| $\alpha$ (deg.)                                                             | 90                      | 90.00(3)       |
| $\beta$ (deg.)                                                              | 94.085(3)               | 90.00(3)       |
| $\gamma$ (deg.)                                                             | 90                      | 90.00(3)       |
| <i>V</i> (Å <sup>3</sup> )                                                  | 14857(3)                | 15687(6)       |
| GOF on <i>F</i> <sup>2</sup>                                                | 1.070                   | 1.150          |
| <i>R</i> <sub>1</sub> , <i>wR</i> <sub>2</sub> ( <i>I</i> > 2σ( <i>I</i> )) | 0.0952, 0.2503          | 0.0274, 0.0504 |
| <i>R</i> <sub>1</sub> , <i>wR</i> <sub>2</sub> (all data)                   | 0.1159, 0.2646          | 0.0323, 0.0517 |

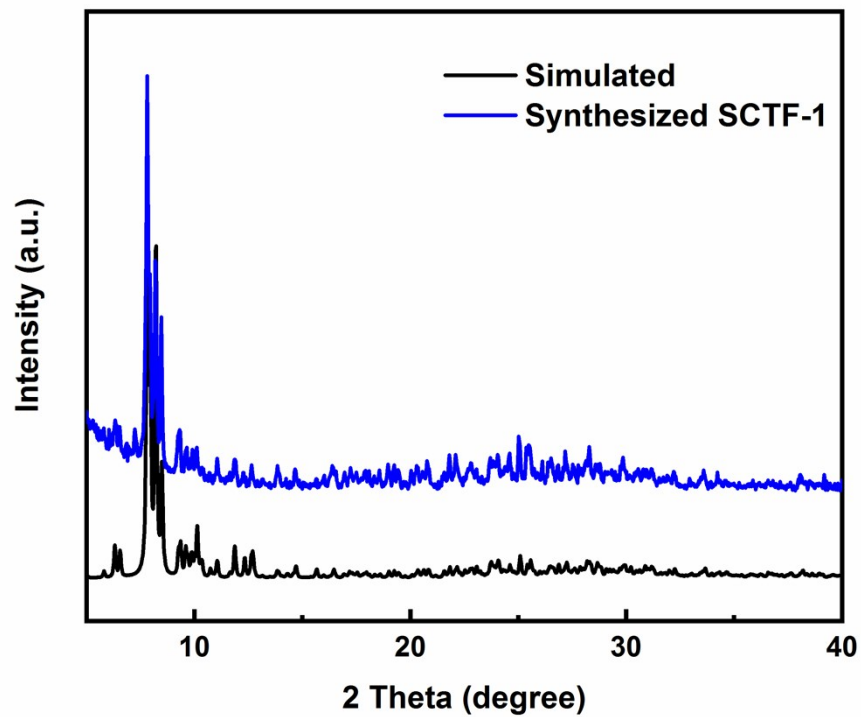

**Figure S1.** Powder X-ray diffraction (PXRD) pattern of as-synthesized SCTF-1 and its simulated one.

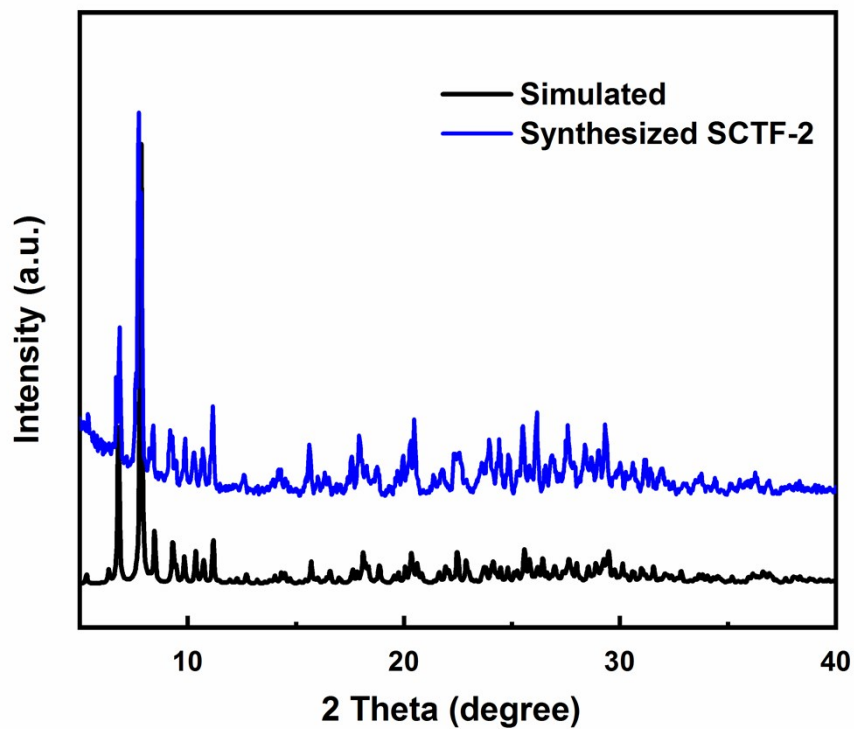

**Figure S2.** Powder X-ray diffraction (PXRD) pattern of as-synthesized SCTF-2 and its simulated one.

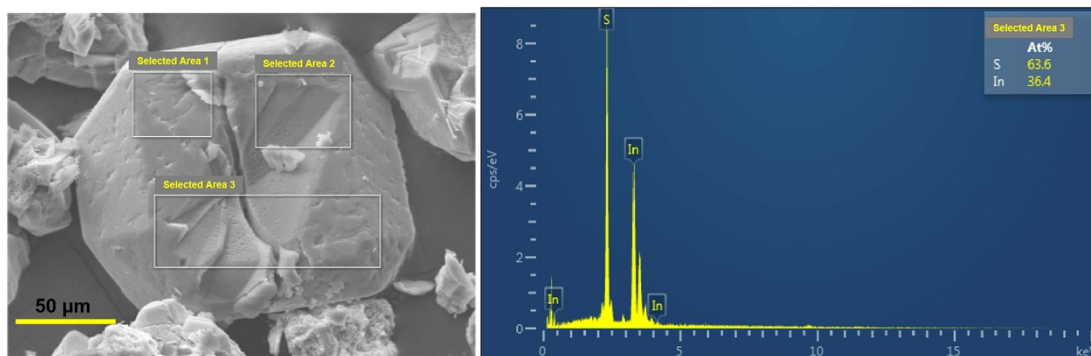

**Figure S3.** Left: SEM image of as-synthesized **SCTF-1** crystals. Right: energy dispersive spectroscopy (EDS) of **SCTF-1**. The results clearly confirmed the presence of In and S elements, and the measured molar ratio of S/In is 1.747, which is consistent with the theoretical value of 1.75.

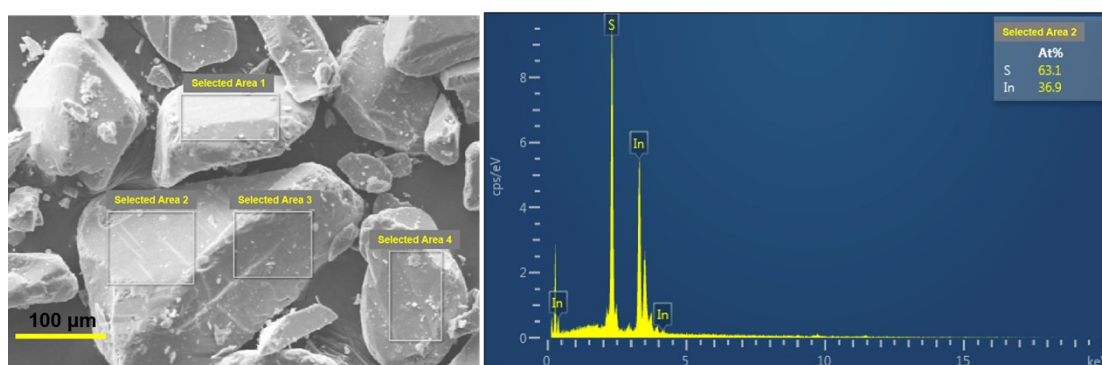

**Figure S4.** Left: SEM image of as-synthesized **SCTF-2** crystals. Right: energy dispersive spectroscopy (EDS) of **SCTF-2**. The results clearly confirmed the presence of In and S elements, and the measured molar ratio of S/In is 1.71, which is consistent with the theoretical value of 1.70.

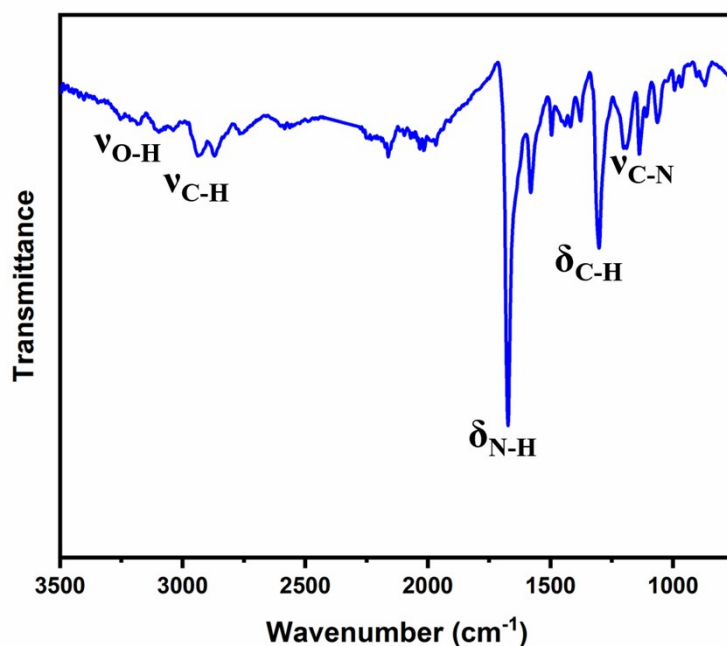

**Figure S5.** FT-IR spectrum of SCTF-1. The bands of IR at about 3235 $\text{cm}^{-1}$  belong to the stretching vibration of the O-H. The IR bands at 2930  $\text{cm}^{-1}$ , 2848  $\text{cm}^{-1}$  and 1310  $\text{cm}^{-1}$  belong to the stretching vibration and bending vibration of the C-H of organic amines. The IR bands at 1650  $\text{cm}^{-1}$  indicate the presence of N-H group. The broad vibration bands of IR at 1310  $\text{cm}^{-1}$ , 1208  $\text{cm}^{-1}$  and 1102  $\text{cm}^{-1}$  belong to the stretching vibration of C-N.

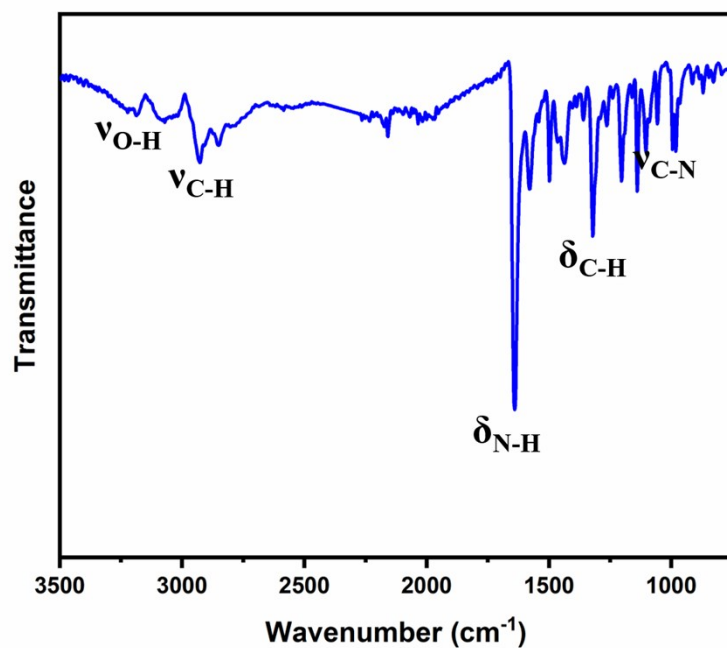

**Figure S6.** FT-IR spectrum of SCTF-2. Important data ( $\text{cm}^{-1}$ ): 3228(w), 2935(w), 2827(w), 1643(s), 1442(m), 1228(m), 1105(m).



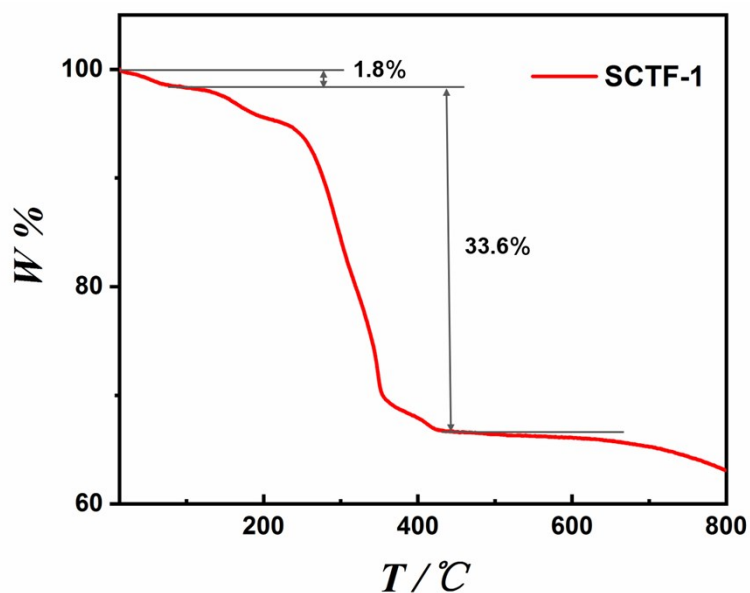

**Figure S7.** Thermal gravimetric (TG) measurement of **SCTF-1**. The initial gradual weight loss of 1.8% between 30-100 °C could be attributed to loss of moisture and solvent adsorbed on the surface of **SCTF-1**. An abrupt weight loss of 33.6% between 100-400 °C is attributed to the carbonization of template and TZ ligands.

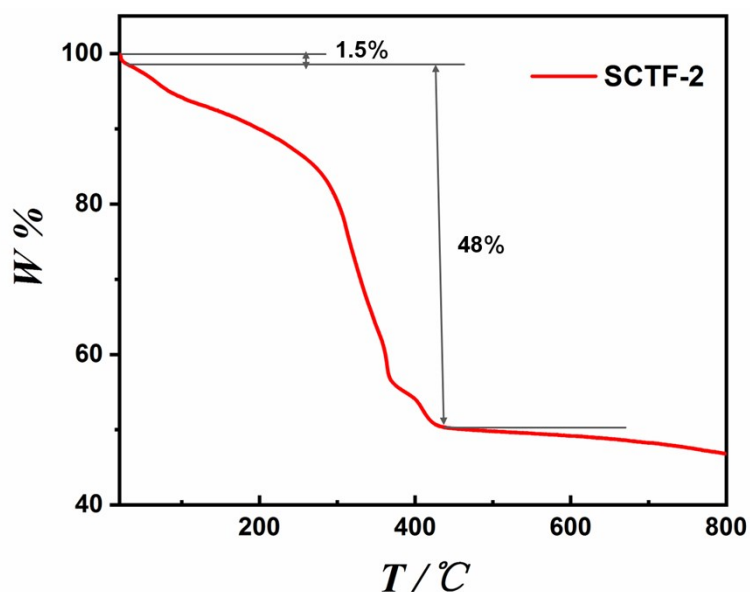

**Figure S8.** Thermal gravimetric (TG) measurement of **SCTF-2**. The initial gradual weight loss of 1.5% between 30-100 °C could be attributed to loss of moisture and solvent adsorbed on the surface of **SCTF-2**. An abrupt weight loss of 48% between 100-400 °C is attributed to the carbonization of template and TZ ligands.

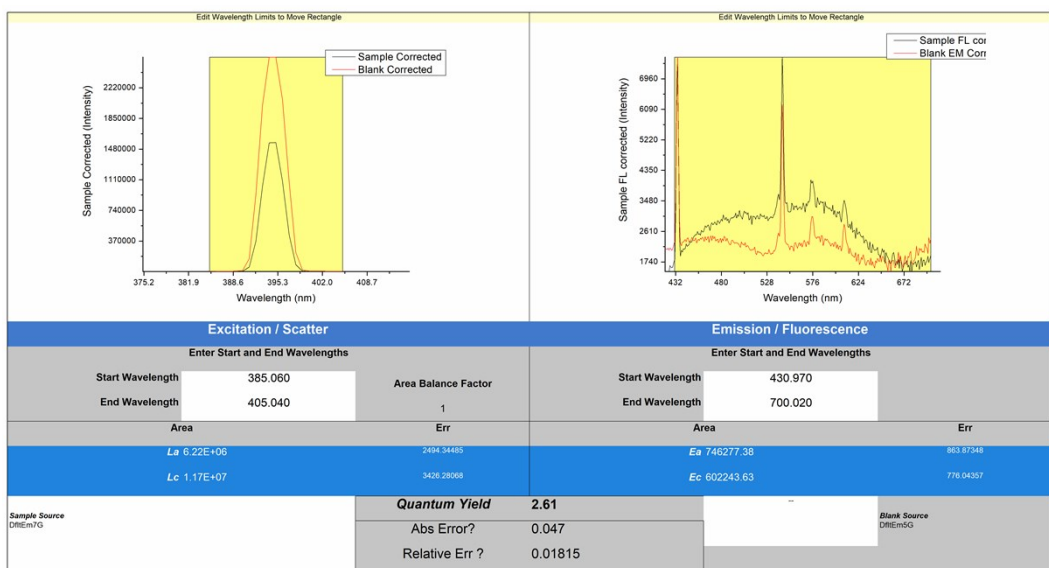

Figure S9. PL quantum yield of SCTF-1.

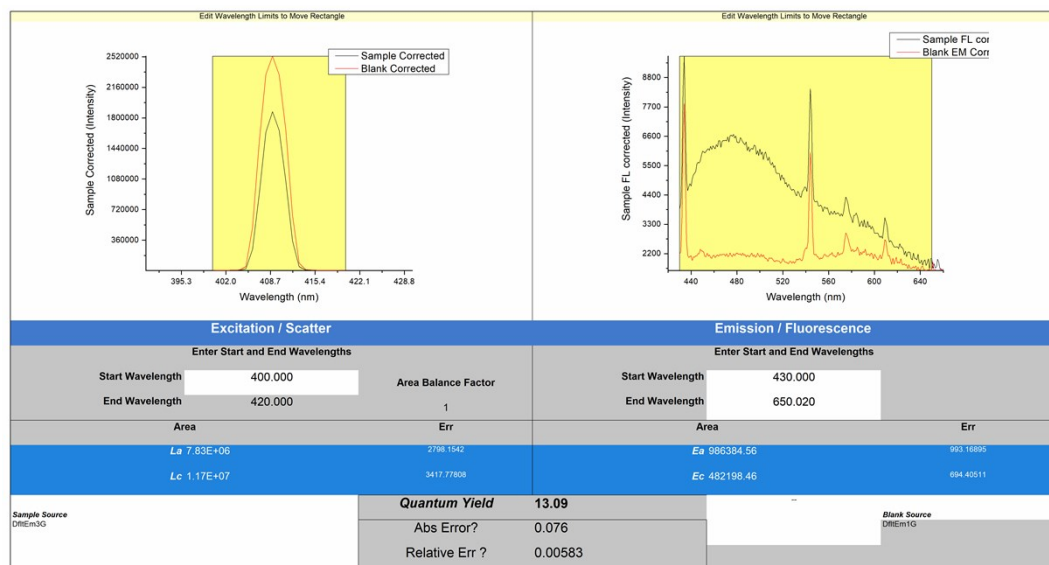

Figure S10. PL quantum yield of SCTF-2.

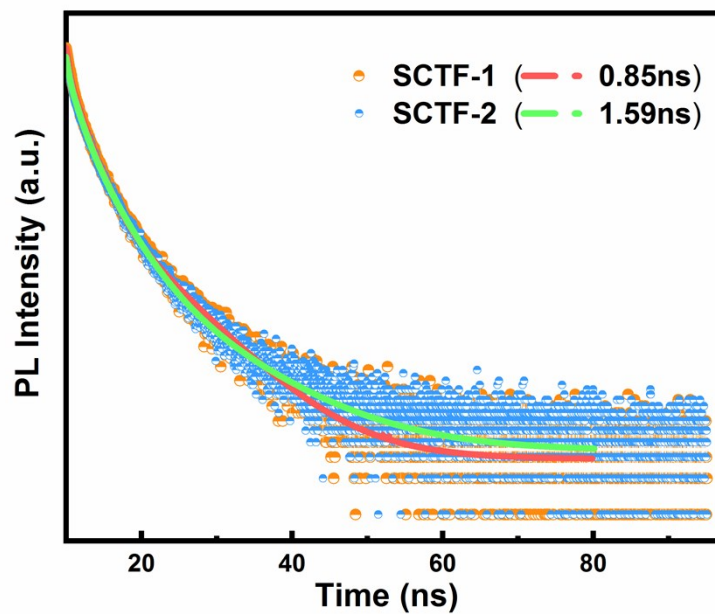

**Figure S11.** The room-temperature PL decay curves of SCTF-1 and SCTF-2.

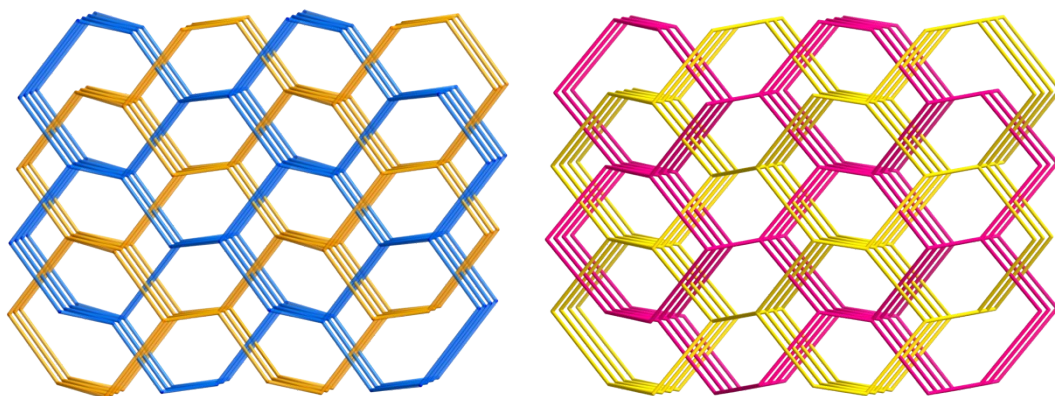

**Figure S12.** Double-interpenetrated *dia* topology of SCTF-1 and SCTF-2 viewed along b axis. (left: SCTF-1, right: SCTF-2).
